# Supplementary material for: Reconfigurable band alignment of SWSe/h-BP heterostructures for photoelectric applications
Source: Royal Society of Chemistry journal article supplement (doi:10.1039/d3cp00952a), 2023-01-01
Supplement: d3cp00952a1.pdf [file d3cp00952a1.pdf]

## Supporting Information

### Reconfigurable band alignment of SeWS/h-BP van der Waals heterostructures for photoelectric applications

Dong Wei<sup>1</sup>, Yi Li<sup>2</sup>, Gaofu Guo<sup>1</sup>, Heng Yu<sup>1</sup>, Yaqiang Ma<sup>1</sup>, Yanan Tang<sup>2</sup>, and Xianqi Dai<sup>1,\*</sup>

<sup>1</sup> School of Physics, Henan Normal University, Xinxiang, Henan 453007, China.

<sup>2</sup> School of Physics and Electronic Engineering, Zhengzhou Normal University, Zhengzhou, Henan 450044, China.

With various stacking orders, the SeWS and h-BP single layer can form different heterobilayer structures, which are labeled by A, B, C, D, E, and F. The D, E and F configurations are obtained by rotating h-BP layer 180° around the vertical axis of the A, B and C type structures, respectively. The a-f configuration is similar to the A-F configuration, the only difference is the contact surface between the SWSe layer and the h-BP layer.

---

\* Address correspondence to E-mail: [xqdai@htu.cn](mailto:xqdai@htu.cn) (Xianqi Dai).

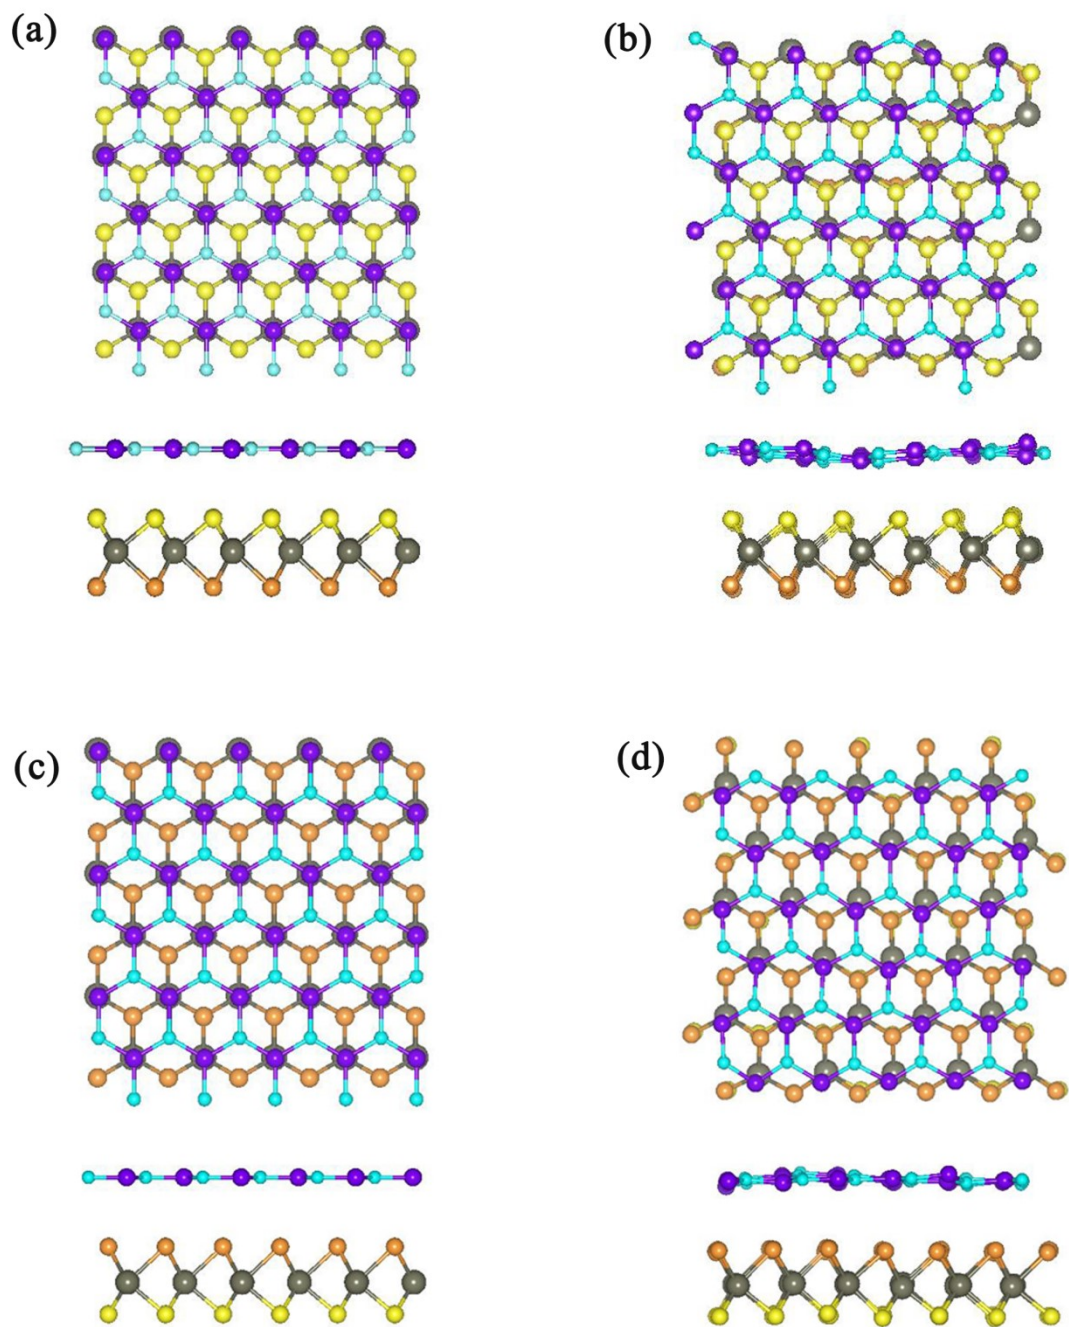

**Fig. S1.** The (a), (b), (c) and (d) are schematic diagrams of the structures of SeWS/h-BP and SWSe/h-BP vdWHs before and after the AIMD simulation, respectively.

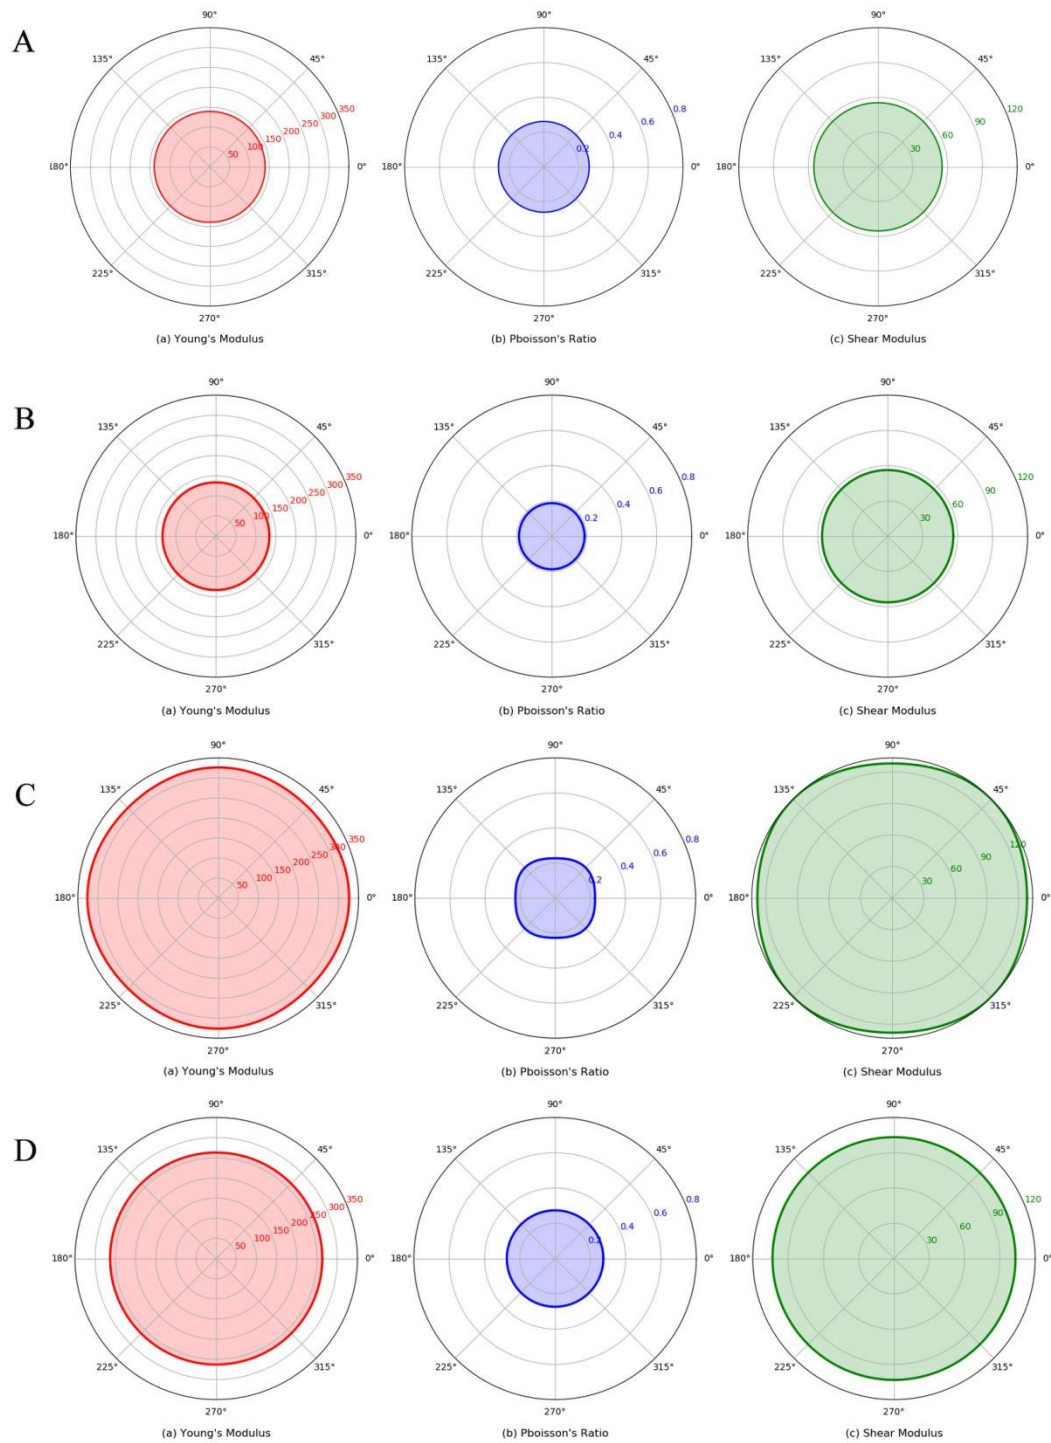

**Fig. S2.** The A, B, C and D are the h-BP, SeWS monolayers, SeWS/h-BP and SWSe/h-BP vdWHs, respectively. The perfect circularity means the vdWHs have perfectly isotropic elastic properties.

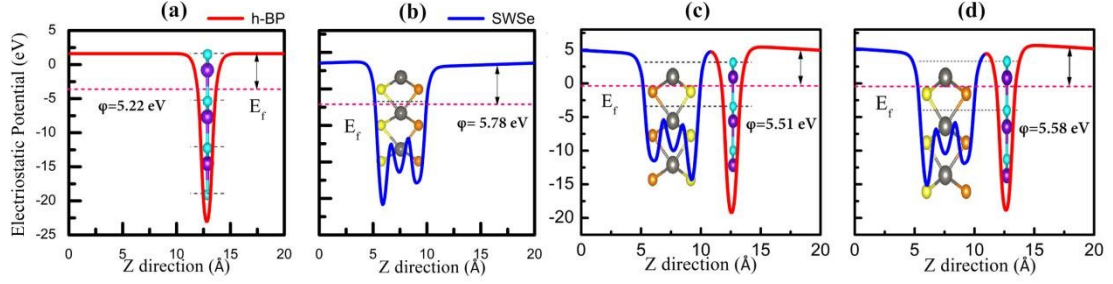

**Fig. S3.** The average electrostatic potential for the (a) h-BP and (b) SWSe monolayer, (c) SeWS/h-BP and (d) SWSe/h-BP vdWHs, respectively.

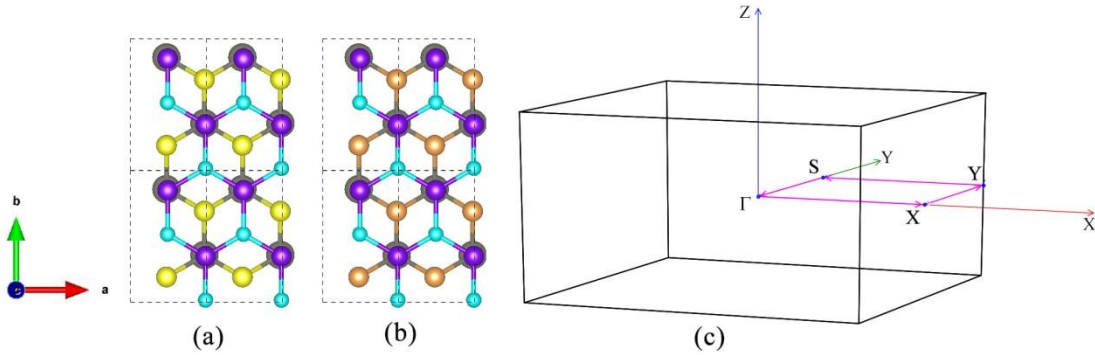

**Fig. S4.** The (a) and (b) are the orthogonal lattice of SeWS/h-BP and SWSe/h-BP vdWHs, respectively. (c) In the first Brillouin zone, the orthogonal supercell has been presented by the pink line with points  $\Gamma$ , X, Y, and S.

To study the mobility properties of electrons and holes, the carrier mobility  $\mu_{2D}$  of the 2D semiconductor can be obtained as follows:

$$\mu_{2D} = \frac{e\hbar^3 C_{2D}}{K_B T m^* m_d E_1^2}$$

(2)

where  $e$  is the electron charge,  $\hbar$  is the reduced Planck constant,  $K_B$  is the Boltzmann constant and  $T$  is the temperature (300 K in our calculations). The  $m^*$  and  $m_d = \sqrt{m_x^* m_y^*}$  are the effective mass and average effective mass of carriers along the transport direction, respectively. The in-plane stiffness  $C_{2D} = 2[\partial^2 E / \partial(\Delta l / l_0)^2] / S_0$ , where the  $E$  is total energy and  $S_0$  is the area of the vdWHs. The  $E_1 = \Delta V / (\Delta l / l_0)$  is the deformation potential constant, the  $\Delta V = \Delta E_{VBM}$  or  $\Delta E_{CBM}$  (strain range from -2% to 2%, calculated using 0.5% steps),  $\Delta l$  and  $l_0$  are the deformation of the lattice constants

along the transport direction and the intrinsic lattice constants, correspondingly.

Here, the effective masses and mobilities of carriers along the  $x$  and  $y$  directions were calculated, in which the orthorhombic lattices were used instead of the hexagonal cells for intrinsic h-BP, SeWS layers and SeWS/h-BP (SWSe/h-BP) vdWHs.

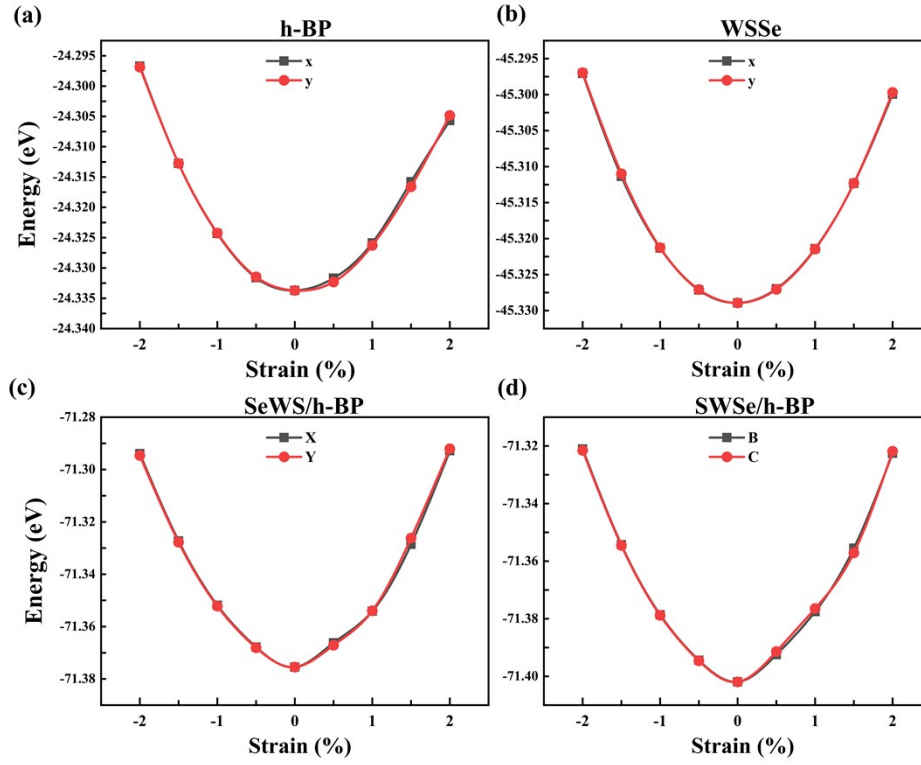

**Fig. S5.** The (a), (b), (c) and (d) are the change of total energy for h-BP, WSSe, SeWS/h-BP vdWHs and SWSe/h-BP vdWHs at -2%-2% uniaxial strain, respectively.

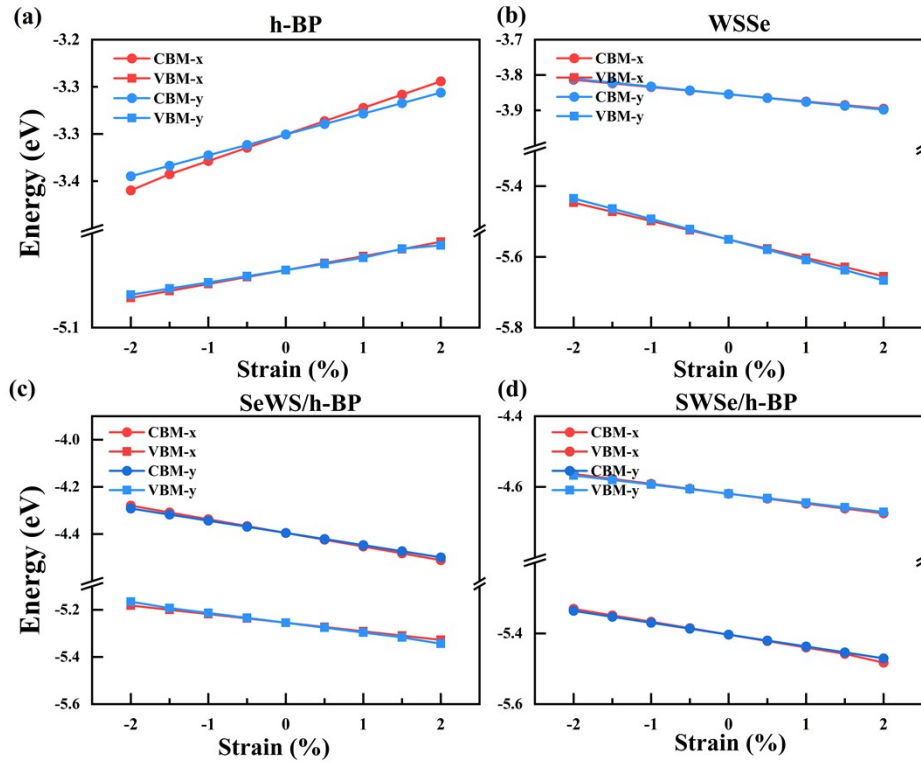

**Fig. S6.** The (a), (b), (c) and (d) are the variation of VBM and CBM energy positions at -2%-2% uniaxial strain for h-BP, WSSe, SeWS/h-BP vdWHs and SWSe/h-BP vdWHs, respectively.

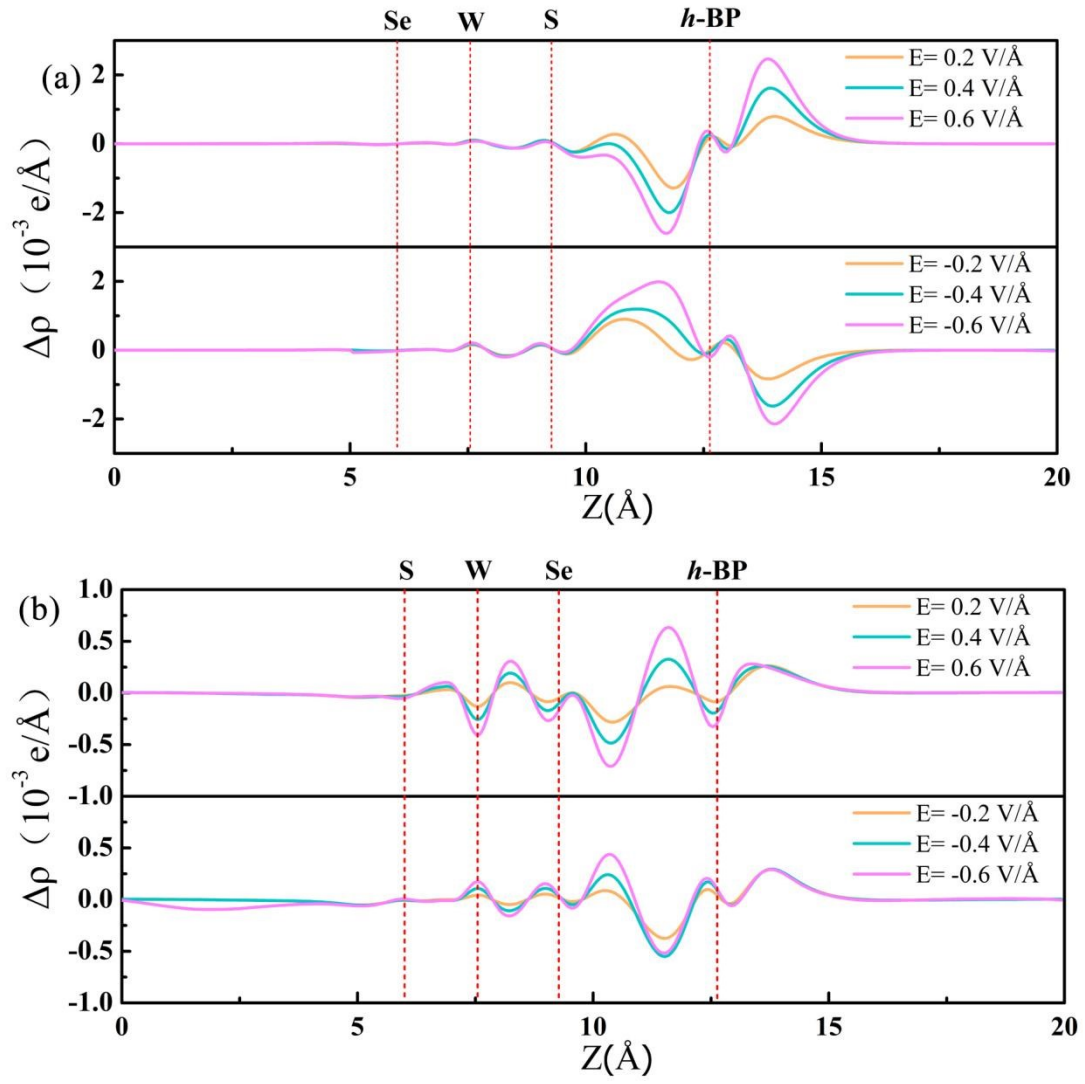

**Fig. S7.** The integrated charge density difference in (a) S and Se vdWHs with various  $E_{field}$  along  $z$  direction.

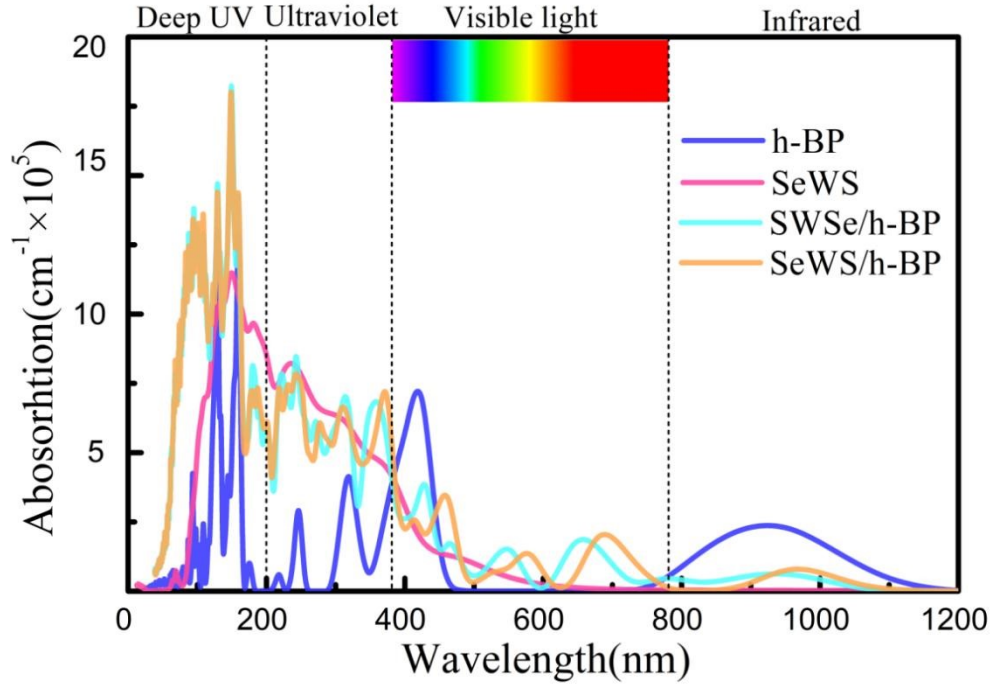

**Fig. S8.** The optical absorption coefficient of the h-BP layer, SeWS layer, SWSe/h-BP and SeWS/h-BP vdWHs.

To explore the optical properties, the frequency-dependent dielectric function  $[\epsilon(\omega)]$  was calculated and obtained the optical absorption coefficient  $\alpha(\omega)$  according to the following equation:

$$\alpha = \sqrt{2}\omega \sqrt{\left(\sqrt{\epsilon_1^2(\omega) + \epsilon_2^2(\omega)} - \epsilon_1(\omega)\right)} \quad (1)$$

where  $\epsilon_1(\omega)$  and  $\epsilon_2(\omega)$  are the real and imaginary parts of the complex dielectric function, respectively.

**Table S1.** The elastic constants of  $C_{11}$ ,  $C_{12}$  and  $C_{66}$  ( $\text{N m}^{-1}$ ), the Young's modulus  $Y$  ( $\text{N m}^{-1}$ ) and Poisson ratio  $\nu$ .

|           | $C_{11}$ | $C_{12}$ | $C_{66}$ | $Y$     | $\nu$ |
|-----------|----------|----------|----------|---------|-------|
| h-BP      | 149.564  | 38.999   | 55.283   | 139.395 | 0.26  |
| SeWS      | 138.511  | 25.980   | 56.265   | 133.683 | 0.19  |
| SeWS/h-BP | 334.023  | 78.118   | 127.952  | 315.753 | 0.23  |
| SWSe/h-BP | 284.206  | 77.725   | 103.24   | 262.950 | 0.27  |

The power conversion efficiency equation:



$$\eta = \frac{J_{SC} V_{OC} \beta_{FF}}{P_{solar}} = \frac{0.65(E_g - \Delta E_c - 0.3) \int_{E_g}^{\infty} P(\hbar\omega) EQE(\hbar\omega)}{\int_0^{\infty} P(\hbar\omega) d(\hbar\omega)} \quad (2)$$

where 0.65 is the band-fill factor ( $\beta_{FF}$ ),  $E_g$  is the bandgap of the donor,  $\Delta E_c$  is the conduction band offset (CBO) at the Anderson Limit. The term  $(E_g - \Delta E_c - 0.3)$  evaluates the maximum open circuit voltage  $V_{oc}$ , where 0.3 eV is an empirical factor that has been discussed. The  $P(\hbar\omega)$  denotes the AM 1.5 solar energy flux ( $\text{W m}^{-2} \text{eV}^{-1}$ ) with  $\hbar\omega$  of phono energy. The integral in the numerator represents the short-circuit current  $J_{sc}$ , assuming 100% external quantum efficiency (EQE), the  $P_{solar}$  is the total incident solar power per area at AM 1.5. The  $E_g$  is regarded as the lower limit of

integration of the term  $\int_{E_g}^{\infty} P(\hbar\omega) EQE(\hbar\omega)$ , where the electrons can be excited into a higher level after absorbing photon energy over  $E_g$ .
